# Supplementary material for: Colorectal cysts as a validating tool for CAR therapy
Source: PubMed Central journal article supplement (PMC7268759; doi:10.1186/s12896-020-00623-0), 2020-06-01
Supplement: 12896_2020_623_MOESM1_ESM.pdf [file 12896_2020_623_MOESM1_ESM.pdf]

**A**

BLI single cells

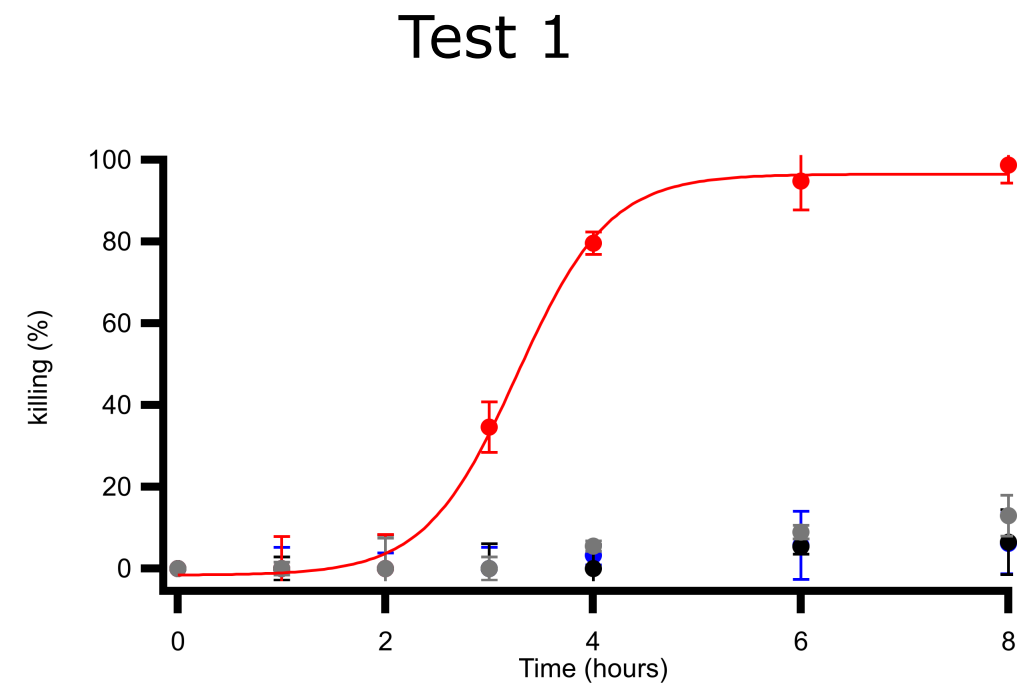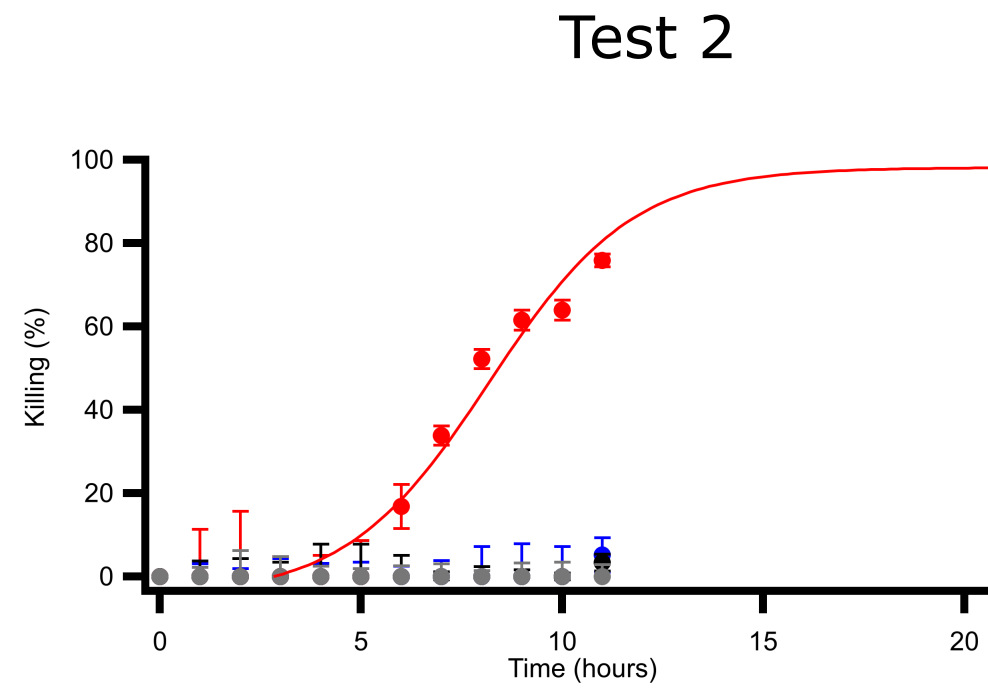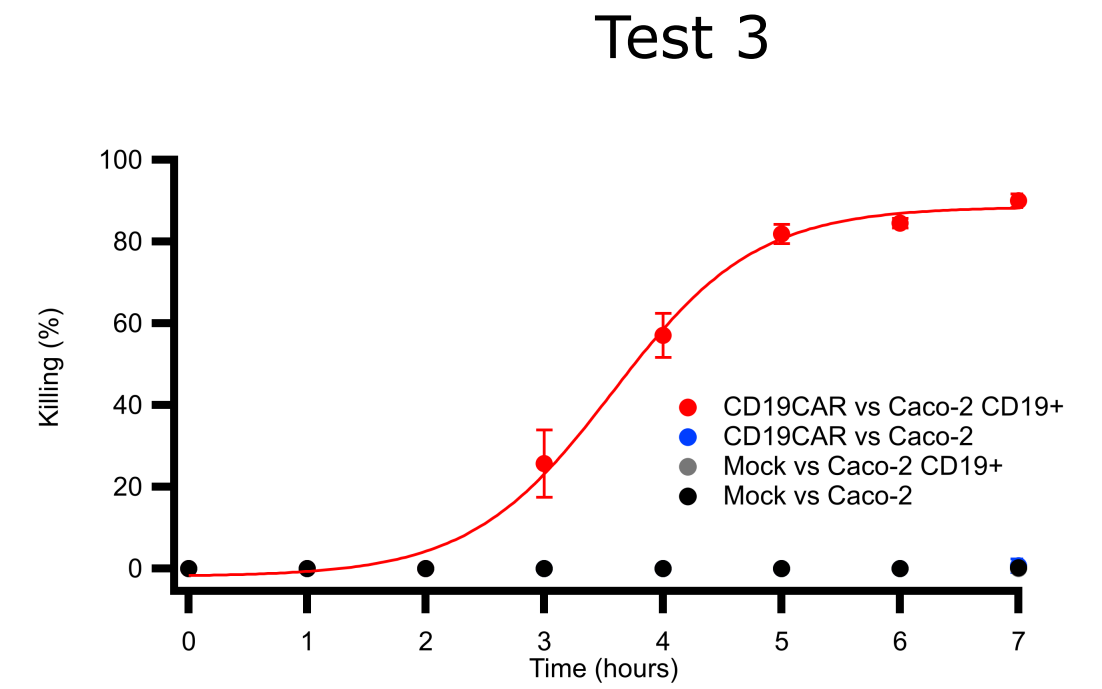**B**

BLI cysts

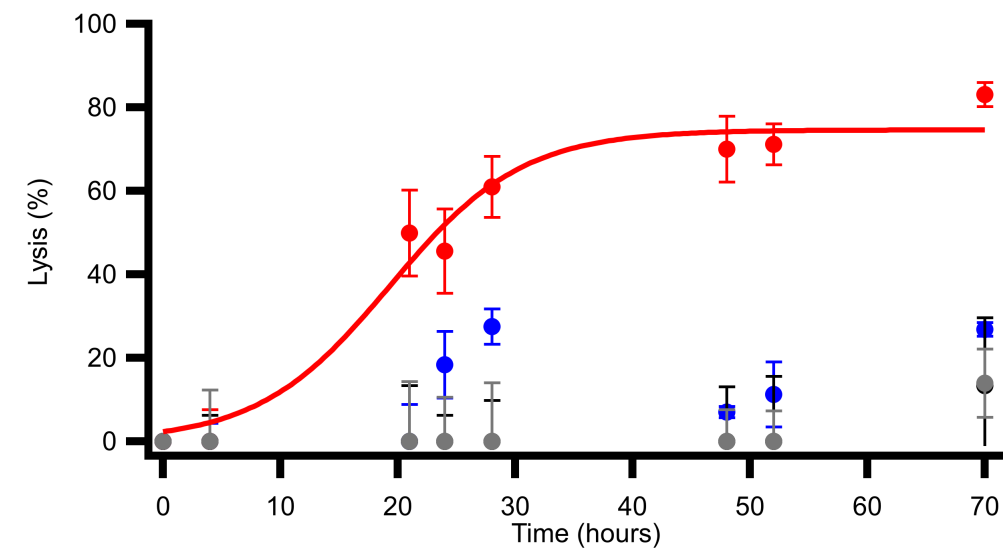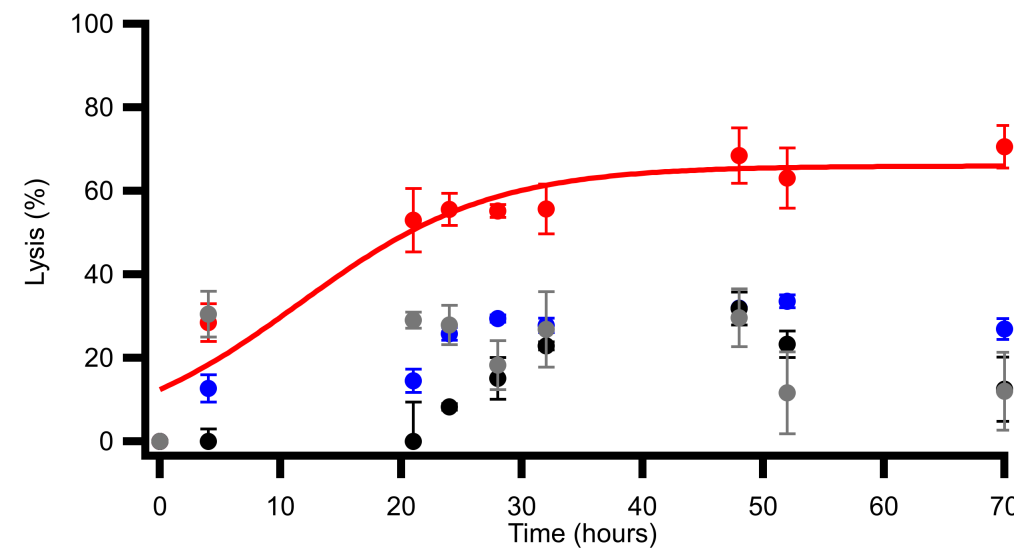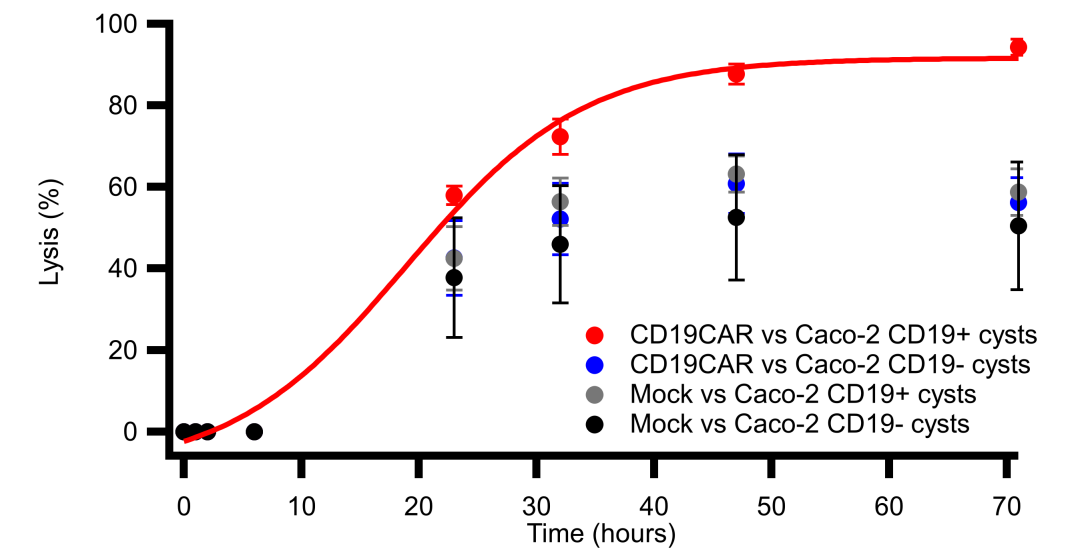

Additional file 1:

- A. Three independent BLI killing assays of Caco-2 cells expressing CD19 or not, co-cultured with CD19CAR or Mock T cells (E:T ratio of 1:10). Data represent mean  $\pm$  S.D.
- B. Three independent BLI killing assays of Caco-2 cysts expressing CD19 or not, co-cultured with CD19CAR or Mock T cells. Data represent mean  $\pm$  S.D.
